# Supplementary material for: Comparative Analysis of HSF Genes From Secale cereale and its Triticeae Relatives Reveal Ancient and Recent Gene Expansions
Source: Front Genet. 2021 Nov 23;12:801218. doi: 10.3389/fgene.2021.801218 (PMC8650501; doi:10.3389/fgene.2021.801218)
Supplement: Supplementary file 3 [file Table3.XLSX]

## Sheet: S.cereale
Table S3. The gene list and classification of HSF genes identified from S. cereale, H. vulgare, T. aestivum, O. sativa and A. thaliana.
Gene name	Classification	E-value	DBD	HR-A	HR-B
ScWN7R01G015600	A1	1.5e-271	TRUE	TRUE	TRUE
ScWN2R01G051200	A2	6.5e-177	TRUE	TRUE	TRUE
ScWN5R01G434100	A2	6.2e-125	TRUE	TRUE	TRUE
ScWN5R01G436400	A2	2.8e-127	TRUE	TRUE	TRUE
ScWN5R01G488100	A2	1e-156	TRUE	TRUE	TRUE
ScWN2R01G215600	A3	4.3e-218	TRUE	TRUE	TRUE
ScWN3R01G379900	A4	3.1e-174	TRUE	TRUE	TRUE
ScWN6R01G024500	A5	7.7e-176	TRUE	TRUE	TRUE
ScWN1R01G521600	A6	3.1e-173	TRUE	TRUE	TRUE
ScWN7R01G129200	A6	6.8e-153	TRUE	TRUE	TRUE
ScWN7R01G170200	A8	1.5e-103	TRUE	TRUE	TRUE
ScWN5R01G252400	B1	7.1e-111	TRUE	TRUE	TRUE
ScWN6R01G217400	B1	7.4e-112	TRUE	TRUE	TRUE
ScWN2R01G448200	B2	1.6e-85	TRUE	TRUE	TRUE
ScWN2R01G473100	B2	1.6e-85	TRUE	TRUE	TRUE
ScWN5R01G347500	B2	1.9e-163	TRUE	TRUE	TRUE
ScWN2R01G144200	B4	1e-155	TRUE	TRUE	TRUE
ScWN5R01G250200	B4	7.9e-151	TRUE	TRUE	TRUE
ScWN3R01G306300	C1	1.8e-104	TRUE	TRUE	TRUE
ScWN3R01G372200	C1	7.4e-108	TRUE	TRUE	TRUE
ScWN3R01G480000	C1	1.6e-86	TRUE	TRUE	TRUE
ScWN5R01G653000	C2	6.9e-166	TRUE	TRUE	TRUE
ScWN5R01G653500	C2	2e-90	TRUE	TRUE	TRUE
ScWN5R01G654800	C2	4.2e-160	TRUE	TRUE	TRUE
ScWN5R01G654900	C2	3.3e-139	TRUE	TRUE	TRUE
ScWN5R01G655400	C2	1e-97	TRUE	TRUE	TRUE
ScWN7R01G256000	B2	3.8e-157	TRUE	TRUE	TRUE
ScWN7R01G358700	A7	1.4e-108	TRUE	TRUE	TRUE
ScWN7R01G358900	A7	7.2e-108	TRUE	TRUE	TRUE
ScWN7R01G363300	C2	8.2e-132	TRUE	TRUE	TRUE
ScWN7R01G394900	A2	1.8e-156	TRUE	TRUE	TRUE

## Sheet: H.vulgare
Gene name	Classification	E-value	DBD	HR-A	HR-B
HORVU.MOREX.r3.5HG0536140.1	A1	1.3e-278	TRUE	TRUE	TRUE
HORVU.MOREX.r3.2HG0108550.1	A2	6.2e-192	TRUE	TRUE	TRUE
HORVU.MOREX.r3.5HG0519000.1	A2	9.6e-159	TRUE	TRUE	TRUE
HORVU.MOREX.r3.5HG0509970.1	A2	3.7e-129	TRUE	TRUE	TRUE
HORVU.MOREX.r3.2HG0134940.1	A3	8.5e-215	TRUE	TRUE	TRUE
HORVU.MOREX.r3.3HG0288860.1	A4	9.6e-188	TRUE	TRUE	TRUE
HORVU.MOREX.r3.1HG0082040.1	A4	2e-185	TRUE	TRUE	TRUE
HORVU.MOREX.r3.6HG0554990.1	A5	1.5e-181	TRUE	TRUE	TRUE
HORVU.MOREX.r3.1HG0083950.1	A6	8.8e-171	TRUE	TRUE	TRUE
HORVU.MOREX.r3.4HG0402170.1	A6	2.3e-155	TRUE	TRUE	TRUE
HORVU.MOREX.r3.7HG0717290.1	A7	9.8e-110	TRUE	TRUE	TRUE
HORVU.MOREX.r3.7HG0749760.1	A7	5.9e-38	TRUE	TRUE	TRUE
HORVU.MOREX.r3.7HG0685260.1	A7	3.5e-29	TRUE	TRUE	FALSE
HORVU.MOREX.r3.4HG0395190.1	A8	7.7e-103	TRUE	TRUE	TRUE
HORVU.MOREX.r3.5HG0486440.1	B1	1.3e-113	TRUE	TRUE	TRUE
HORVU.MOREX.r3.7HG0686980.1	B2	1.8e-163	TRUE	TRUE	TRUE
HORVU.MOREX.r3.5HG0497990.1	B2	4.8e-163	TRUE	TRUE	TRUE
HORVU.MOREX.r3.2HG0187550.1	B2	1.6e-83	TRUE	TRUE	TRUE
HORVU.MOREX.r3.2HG0119970.1	B4	1.4e-156	TRUE	TRUE	TRUE
HORVU.MOREX.r3.5HG0486260.1	B4	4.2e-154	TRUE	TRUE	TRUE
HORVU.MOREX.r3.3HG0286890.1	C1	2.4e-106	TRUE	TRUE	TRUE
HORVU.MOREX.r3.3HG0273590.1	C1	3.9e-105	TRUE	TRUE	TRUE
HORVU.MOREX.r3.3HG0305080.1	C1	2.3e-91	TRUE	TRUE	TRUE
HORVU.MOREX.r3.4HG0418180.1	C2	2.9e-159	TRUE	TRUE	TRUE
HORVU.MOREX.r3.4HG0417910.1	C2	3.5e-137	TRUE	TRUE	TRUE
HORVU.MOREX.r3.7HG0718540.1	C2	5.4e-134	TRUE	TRUE	TRUE
HORVU.MOREX.r3.4HG0342180.1	C2	5.2e-84	TRUE	TRUE	TRUE

## Sheet: T.aestivum
Gene name	Classification	E-value	DBD	HR-A	HR-B
TraesCS5D02G553300	A1	6.9e-275	TRUE	TRUE	TRUE
TraesCS4A02G322300	A1	2.7e-271	TRUE	TRUE	TRUE
TraesCS5B02G556200	A1	2e-273	TRUE	TRUE	TRUE
TraesCS2B02G105100	A2	6.8e-181	TRUE	TRUE	TRUE
TraesCS5A02G383800	A2	4.4e-122	TRUE	TRUE	TRUE
TraesCS5D02G393200	A2	4.2e-126	TRUE	TRUE	TRUE
TraesCS3B02G438900	A2	1e-132	TRUE	TRUE	TRUE
TraesCS2D02G087400	A2	8.3e-180	TRUE	TRUE	TRUE
TraesCS3A02G405200	A2	1.8e-138	TRUE	TRUE	TRUE
TraesCS2A02G089300	A2	2.2e-186	TRUE	TRUE	TRUE
TraesCS2D02G211400	A3	4.9e-218	TRUE	TRUE	TRUE
TraesCS2B02G232000	A3	2e-210	TRUE	TRUE	TRUE
TraesCS2A02G204500	A3	3.9e-213	TRUE	TRUE	TRUE
TraesCS3B02G323800	A4	3.2e-181	TRUE	TRUE	TRUE
TraesCS1A02G350400	A4	1.9e-205	TRUE	TRUE	TRUE
TraesCS3A02G289200	A4	5.3e-182	TRUE	TRUE	TRUE
TraesCS6D02G083800	A5	4e-179	TRUE	TRUE	TRUE
TraesCS6A02G098800	A5	7.9e-179	TRUE	TRUE	TRUE
TraesCS6B02G127000	A5	6.6e-174	TRUE	TRUE	TRUE
TraesCS1A02G375600	A6	1.9e-159	TRUE	TRUE	TRUE
TraesCS1D02G382900	A6	2.1e-159	TRUE	TRUE	TRUE
TraesCS4B02G278100	A6	3.9e-155	TRUE	TRUE	TRUE
TraesCS4D02G276500	A6	1.4e-153	TRUE	TRUE	TRUE
TraesCS4A02G027700	A6	5.2e-150	TRUE	TRUE	TRUE
TraesCS7B02G267300	A7	3.1e-107	TRUE	TRUE	TRUE
TraesCS7A02G360400	A7	4.7e-104	TRUE	TRUE	TRUE
TraesCS4B02G239700	A8	1.4e-103	TRUE	TRUE	TRUE
TraesCS4D02G239600	A8	4.3e-103	TRUE	TRUE	TRUE
TraesCS4A02G062800	A8	6.6e-105	TRUE	TRUE	TRUE
TraesCS5A02G237900	B1	1.5e-112	TRUE	TRUE	TRUE
TraesCS5B02G236400	B1	9.1e-108	TRUE	TRUE	TRUE
TraesCS5D02G244800	B1	3e-111	TRUE	TRUE	TRUE
TraesCS7A02G270100	B2	1.1e-166	TRUE	TRUE	TRUE
TraesCS5A02G314700	B2	5.7e-164	TRUE	TRUE	TRUE
TraesCS5D02G321000	B2	2.3e-163	TRUE	TRUE	TRUE
TraesCS5B02G315600	B2	2e-162	TRUE	TRUE	TRUE
TraesCS2D02G399000	B2	1.1e-85	TRUE	TRUE	TRUE
TraesCS2A02G401600	B2	2.4e-86	TRUE	TRUE	TRUE
TraesCS2B02G419600	B2	2.4e-87	TRUE	TRUE	TRUE
TraesCS2A02G146600	B4	1e-154	TRUE	TRUE	TRUE
TraesCS5D02G243900	B4	5.5e-151	TRUE	TRUE	TRUE
TraesCS5B02G236100	B4	5.8e-153	TRUE	TRUE	TRUE
TraesCS5A02G237600	B4	9.9e-155	TRUE	TRUE	TRUE
TraesCS2D02G151200	B4	6e-155	TRUE	TRUE	TRUE
TraesCS2B02G171900	B4	1.5e-152	TRUE	TRUE	TRUE
TraesCS3B02G255600	C1	6e-105	TRUE	TRUE	TRUE
TraesCS3A02G229000	C1	6.6e-107	TRUE	TRUE	TRUE
TraesCS3B02G314600	C1	8.7e-107	TRUE	TRUE	TRUE
TraesCS3D02G227200	C1	2.8e-106	TRUE	TRUE	TRUE
TraesCS3D02G386000	C1	8.7e-91	TRUE	TRUE	TRUE
TraesCS3A02G393200	C1	9.9e-94	TRUE	TRUE	TRUE
TraesCS3A02G280800	C1	3.5e-108	TRUE	TRUE	TRUE
TraesCS3B02G425200	C1	1.8e-90	TRUE	TRUE	TRUE
TraesCS3D02G385900	C1	4.1e-90	TRUE	TRUE	TRUE
TraesCS3A02G393100	C1	3.3e-79	TRUE	TRUE	TRUE
TraesCS3D02G280600	C1	1.7e-108	TRUE	TRUE	TRUE
TraesCS5A02G524000	C2	6.6e-95	TRUE	TRUE	TRUE
TraesCS7D02G367700	C2	1.1e-131	TRUE	TRUE	TRUE
TraesCS7A02G355300	C2	2.1e-130	TRUE	TRUE	TRUE
TraesCS7B02G272500	C2	3.7e-132	TRUE	TRUE	TRUE
TraesCSU02G127200	C2	9.2e-146	TRUE	TRUE	TRUE
TraesCS4B02G383400	C2	1.2e-147	TRUE	TRUE	TRUE
TraesCS4B02G385800	C2	1.3e-148	TRUE	TRUE	TRUE
TraesCSU02G127300	C2	6.8e-154	TRUE	TRUE	TRUE
TraesCS4B02G383300	C2	8.7e-168	TRUE	TRUE	TRUE
TraesCS5A02G550700	C2	8.4e-172	TRUE	TRUE	TRUE
TraesCS5A02G548700	C2	6e-172	TRUE	TRUE	TRUE
TraesCS4D02G358900	C2	3.2e-180	TRUE	TRUE	TRUE
TraesCS3B02G568300	C2	4.8e-189	TRUE	TRUE	TRUE

## Sheet: O.sativa
Gene name	Classification	E-value	DBD	HR-A	HR-B
LOC_Os03g63750.1	A1	7.2e-247	TRUE	TRUE	TRUE
LOC_Os03g06630.1	A2	1.1e-130	TRUE	TRUE	TRUE
LOC_Os03g53340.1	A2	3.7e-138	TRUE	TRUE	TRUE
LOC_Os03g58160.1	A2	5.9e-160	TRUE	TRUE	TRUE
LOC_Os07g08140.1	A2	2.1e-175	TRUE	TRUE	TRUE
LOC_Os02g32590.1	A3	2e-182	TRUE	TRUE	TRUE
LOC_Os01g54550.1	A4	4.7e-210	TRUE	TRUE	TRUE
LOC_Os05g45410.1	A4	5.3e-167	TRUE	TRUE	TRUE
LOC_Os02g29340.1	A5	3.9e-192	TRUE	TRUE	TRUE
LOC_Os10g28340.1	A6	2.3e-182	TRUE	TRUE	TRUE
LOC_Os01g39020.1	A7	2.5e-179	TRUE	TRUE	TRUE
LOC_Os06g36930.1	A7	3.5e-143	TRUE	TRUE	TRUE
LOC_Os03g12370.1	A8	4.3e-156	TRUE	TRUE	TRUE
LOC_Os09g28354.1	B1	3.8e-134	TRUE	TRUE	TRUE
LOC_Os04g48030.1	B2	5.2e-107	TRUE	TRUE	TRUE
LOC_Os08g43334.1	B2	1.3e-166	TRUE	TRUE	TRUE
LOC_Os09g35790.1	B2	4.8e-157	TRUE	TRUE	TRUE
LOC_Os03g25120.1	B4	2.7e-162	TRUE	TRUE	TRUE
LOC_Os07g44690.1	B4	1.3e-157	TRUE	TRUE	TRUE
LOC_Os08g36700.1	B4	9.3e-149	TRUE	TRUE	TRUE
LOC_Os09g28200.1	B4	2.2e-157	TRUE	TRUE	TRUE
LOC_Os01g43590.1	C1	1.2e-99	TRUE	TRUE	TRUE
LOC_Os01g53220.1	C1	7.6e-103	TRUE	TRUE	TRUE
LOC_Os02g13800.1	C2	5.8e-198	TRUE	TRUE	TRUE
LOC_Os06g35960.1	C2	2.1e-145	TRUE	TRUE	TRUE

## Sheet: A.thaliana
Gene name	Classification	E-value	DBD	HR-A	HR-B
AT1G32330.1	A1	6.5e-190	TRUE	TRUE	TRUE
AT3G02990.1	A1	1.3e-238	TRUE	TRUE	TRUE
AT4G17750.1	A1	1.6e-179	TRUE	TRUE	TRUE
AT5G16820.1	A1	1.4e-219	TRUE	TRUE	TRUE
AT2G26150.1	A2	1.7e-203	TRUE	TRUE	TRUE
AT5G03720.1	A3	1.1e-198	TRUE	TRUE	TRUE
AT4G18880.1	A4	5.6e-184	TRUE	TRUE	TRUE
AT5G45710.1	A4	9.2e-208	TRUE	TRUE	TRUE
AT4G13980.1	A5	0	TRUE	TRUE	TRUE
AT3G22830.1	A6	3.6e-232	TRUE	TRUE	TRUE
AT5G43840.1	A6	9e-146	TRUE	TRUE	TRUE
AT3G51910.1	A7	5.9e-153	TRUE	TRUE	TRUE
AT3G63350.1	A7	1.3e-144	TRUE	TRUE	TRUE
AT1G67970.1	A8	8e-165	TRUE	TRUE	TRUE
AT4G36990.1	B1	2.9e-181	TRUE	TRUE	TRUE
AT4G11660.1	B2	3.3e-203	TRUE	TRUE	TRUE
AT5G62020.1	B2	6.3e-175	TRUE	TRUE	TRUE
AT2G41690.1	B3	3.9e-157	TRUE	TRUE	TRUE
AT1G46264.1	B4	1.6e-196	TRUE	TRUE	TRUE
AT3G24520.1	C1	1e-199	TRUE	TRUE	TRUE
